# Supplementary material for: FAK activates AKT-mTOR signaling to promote the growth and progression of MMTV-Wnt1-driven basal-like mammary tumors
Source: PubMed Central journal article supplement (PMC7268629; doi:10.1186/s13058-020-01298-3), 2020-06-03
Supplement: 13058_2020_1298_MOESM1_ESM.pdf [file 13058_2020_1298_MOESM1_ESM.pdf]

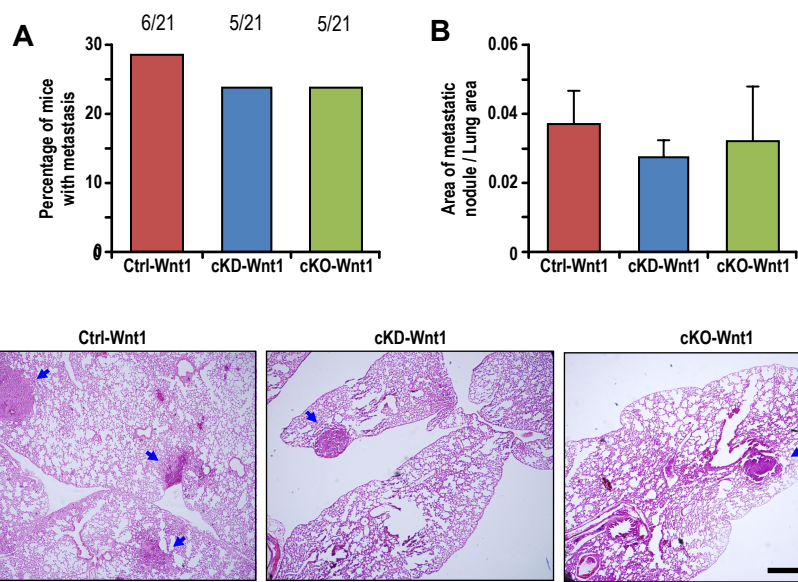

Figure S1 (1-26-20)

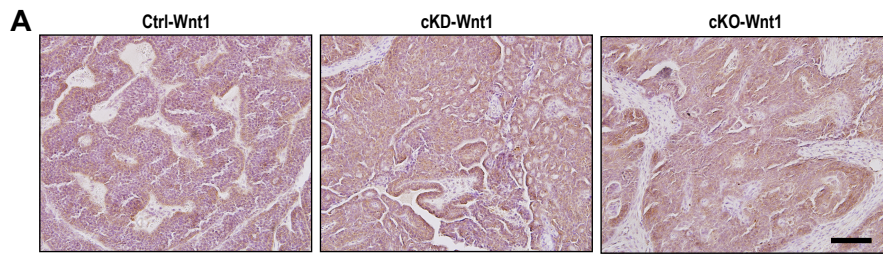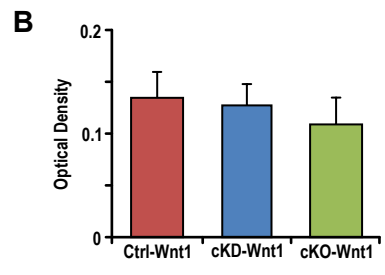

Figure S2 (1-26-20)

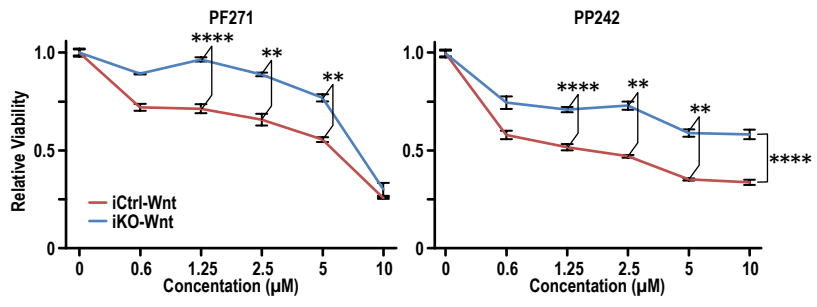

Figure S3 (1-26-20)
